# Supplementary material for: Gut microbiota in patients with prostate cancer: a systematic review and meta-analysis
Source: BMC Cancer. 2024 Feb 24;24:261. doi: 10.1186/s12885-024-12018-x (PMC10893726; doi:10.1186/s12885-024-12018-x)
Supplement: Supplementary file 5 — Supplementary Material 5. [file 12885_2024_12018_MOESM5_ESM.zip]

Archive with 1 entries (1 files):
- Additional file 5/Table S3-7. Eggerí»s and Beggí»s tests for publication bias in relative abundance of GM.docx
